# Supplementary material for: The evolution of social parasitism in Formica ants revealed by a global phylogeny
Source: PubMed Central journal article supplement — Proc Natl Acad Sci U S A. 2021 Sep 17;118(38):e2026029118. doi: 10.1073/pnas.2026029118 (PMC8463886; doi:10.1073/pnas.2026029118), 2021-09-17
Supplement: pnas.2026029118.sapp.pdf [file pnas.2026029118.sapp.pdf]

1

2 **Supplementary Information for**  
3 **The evolution of social parasitism in *Formica* ants revealed by a global phylogeny**  
4 **Marek L. Borowiec, Stefan P. Cover and Christian Rabeling**  
5 **Marek L. Borowiec and Christian Rabeling**  
6 **E-mail: mlborowiec@uidaho.edu, crabeling@gmail.com**

7 **This PDF file includes:**  
8     Supplementary text  
9     Figs. S1 to S9  
10    Tables S1 to S2  
11    References for SI reference citations

## 12 Supporting Information Text

### 13 Supplementary Methods

14 **Data availability.** Trimmed reads generated for this study are available at the NCBI Sequence Read Archive (BioProject ID  
15 PRJNA749764). Detailed voucher collection information, assembled sequences, analyzed matrices, configuration files and  
16 output of all analyses, and code used are available on Zenodo (DOI: [10.5281/zenodo.4341310](https://doi.org/10.5281/zenodo.4341310)).

17 **Taxon sampling.** For this study we gathered samples collected in the past ~60 years which were available as either ethanol-  
18 preserved or point-mounted specimens. Taxon sampling comprises 101 newly sequenced ingroup morphospecies from all seven  
19 species groups of *Formica* ants (1) that were recognized prior to our study and 8 outgroup species. Our sampling was guided  
20 by previous taxonomic and phylogenetic work (1–17) and included representatives from both the New and the Old World.  
21 Collection data associated with sequenced samples can be found in Table S1.

22 **Molecular data collection and sequencing.** We performed non-destructive extraction and preserved same-specimen vouchers  
23 for each newly sequenced sample. We re-mounted all vouchers, assigned unique specimen identifiers (Table S1), and deposited  
24 them in the ASU Social Insect Biodiversity Repository (contact: Christian Rabeling, christian.rabeling@asu.edu). Detailed  
25 voucher collection data can be accessed at [10.5281/zenodo.4341310](https://doi.org/10.5281/zenodo.4341310). Briefly, we extracted DNA from all newly sequenced  
26 specimens using a DNeasy Blood and Tissue Kit (Qiagen, Valencia, CA, USA) and followed a library preparation protocol that  
27 follows was slightly modified from (18). We used a KAPA Hyper Prep Library Kit (Kapa Biosystems, Inc., Wilmington, MA,  
28 USA) with magnetic bead cleanup (19) and a SPRI substitute (20) as described in (21). We used TruSeq adapters (22) for  
29 ligation followed by PCR amplification of the library using a mix of HiFi HotStart polymerase reaction mix (Kapa Biosystems),  
30 Illumina TruSeq primers, and nuclease-free water.

31 We enriched each pool with 9,446 custom-designed probes (MYcroarray, Inc.) targeting 2,524 UCE loci in Hymenoptera  
32 (23). We followed library enrichment procedures for the MYcroarray MYBaits kit (24) except we used a 0.1× of the standard  
33 MYBaits concentration and added 0.7 μL of 500 μM custom blocking oligos designed against the custom sequence tags. We ran  
34 the hybridization reaction for 24 h at 65 °C, subsequently bound all pools to streptavidin beads (MyOne C1; Life Technologies)  
35 and washed bound libraries according to a standard target enrichment protocol (24). We used the with-bead approach for  
36 PCR recovery of enriched libraries as described in (25).

37 We submitted pre-pooled libraries to the University of Utah High Throughput Genomics Core Facility for quality control  
38 on Agilent Bioanalyzer (Agilent Technologies, Santa Clara, CA, USA) and normalization. The pooled libraries were then  
39 sequenced using one full and one partial lane of a HiSeq 125 Cycle Paired-End Sequencing v4 run. Quality-trimmed sequence  
40 reads generated as part of this study are available from the NCBI Sequence Read Archive (to be submitted upon publication).

41 **Processing of UCE data.** We performed read cleaning, assembly, and matching of assembled contigs to UCE probes using  
42 Phyluce bioinformatics pipeline (25). We trimmed the FASTQ data using Illumiprocessor, a wrapper around Trimmomatic  
43 (26), with default settings (LEADING:5, TRAILING:15, SLIDINGWINDOW:4:15, MINLEN:40). Assemblies were done using  
44 Trinity v20140717 (27) with the phyluce\_assembly\_assemble\_trinity wrapper. We then assessed orthology by matching the  
45 assembled contigs to enrichment probe sequences with phyluce\_assembly\_match\_contigs\_to\_probes (min\_coverage=50,  
46 min\_identity=80).

47 **Alignment.** We used phylogeny-aware UPP workflow (28) to align all UCE sequences. We used AMAS (29) for alignment  
48 wrangling and obtaining summary statistics and AliView (30) for visualization. Although alignment trimming has been  
49 criticized in the past (31), we decided to trim the alignments because of substantial computational burden associated with  
50 analysis of untreated data with high proportion of gaps. We used trimAl (32) and its “gappyout” algorithm, which is a  
51 relatively relaxed algorithm for removal of gappy sites. Visual inspection of alignments revealed that occasionally sequences  
52 were misaligned towards flanks. To automatically identify and discard the misaligned sequences we wrote a custom R script  
53 (R Core Team) that leveraged packages ape (33, 34), seqinr (35), doParallel, and plyr. The script first generates a matrix of  
54 uncorrected p-distances from a UCE locus alignment and for each taxon it computes average p-distance to all other taxa. Then  
55 it creates a distribution of average per-locus p-distances for each taxon and detects outliers defined as sequences that lay above  
56 3 SD from the mean of that distribution. Once identified, the script removes outliers using AMAS. This procedure resulted in  
57 removal of 0.97 % of all sequences. For downstream analyses we retained only alignments that had 110 or more taxa (70 % of  
58 total), resulting in 2,242 loci on average 667 nt long. The resulting concatenated matrix was 1,497,044 nt long and contained  
59 17.58 % of missing data and gaps.

60 **Partitioning.** We used ModelFinder (36) as implemented in IQ-TREE (37). For each UCE we selected the best model under  
61 AICc. These models were then used for by-locus partitioned analysis of concatenated data matrix (38). We have also employed  
62 the newly proposed strategy of partitioning UCE loci based on a sliding window approach that groups UCE sites with similar  
63 entropies (39). Unfortunately, many partitions identified using this approach were saturated and caused numerical instability  
64 in maximum likelihood analyses using IQ-TREE, resulting in unreasonably long tree lengths. We therefore proceeded with  
65 downstream analyses using per-locus partitioning.

66 **Phylogenetic and concordance analyses using maximum likelihood.** We used IQ-TREE (37) for maximum likelihood inference  
67 of phylogeny on single-locus alignments and concatenated data matrix. To test the robustness of the partitioned concatenated  
68 analysis, we performed unpartitioned analysis under HKY+4G model, which was the most common model identified as best  
69 under AICc for single loci. To assess the sensitivity of our results using measures other than bootstrap support we performed a  
70 quartet sampling analysis with 500 maximum replicates (40). Results are summarized in Figure S7.

71 **Species tree analyses.** In addition to concatenated analyses we performed coalescent-based species tree estimation using  
72 ASTRAL-III (41). Because summary coalescence methods such as ASTRAL have been shown to be negatively impacted  
73 by error in estimated gene trees (42) we used the weighted statistical binning pipeline (43, 44). We collapsed all nodes  
74 with ultrafast bootstrap (45) support below 95 for the binning pipeline, which resulted in identification of 1,733 supergenes  
75 containing from one to three UCE loci. We then used IQ-TREE to estimate supergene trees under a fully partitioned model  
76 (i.e. with branch lengths unlinked across partitions). Because of recent criticism of the statistical binning pipeline (46) we also  
77 performed an analysis where raw trees from individual locus analyses were used. We mapped all terminals to putative species  
78 using morphology and the concatenated tree as guidance. Because some of the 101 species we recognized using morphology  
79 were non-monophyletic on the concatenated tree, we mapped the terminals onto 113 total monophyletic lineages representing  
80 putative species (Figures S4–S6). To test the effect of missing data (47) on the position of *Formica talbotae* we performed  
81 additional analysis that used only the 67 loci which contained at least 50 % complete sequence for this taxon (Figure S6).

82 **Divergence time inference.** For divergence time analyses we used a node dating approach, as implemented in MCMCTree, a  
83 part of the PAML package, v4.9e (48). MCMCTree utilized rapid approximate likelihood computation (49), which makes  
84 it suitable for divergence dating of genome-scale data sets (50). We constrained our root node with soft bounds around a  
85 conservative maximum age estimate of 79 Ma, which corresponds to the lower bound of the 95 % highest posterior density  
86 interval for that split in (18). Although *Formica* has a rich fossil record, the affinity of these fossils is uncertain because, as this  
87 study shows, morphology has thus far been misleading about phylogeny. Because of this, we conservatively constrained the  
88 split of *Polyergus* and *Formica*+*Iberoformica* to be at least 34 Ma, or one of the younger estimates for the age of Baltic amber  
89 (51, 52). We ran each analysis unpartitioned, under the HKY+4G model for 20 million generations. We examined each run's  
90 statistics in Tracer.

91 **Biogeographic analyses.** For biogeographic inference we used BioGeoBEARS v1.1.2 (53). We discretized the distribution of  
92 *Formica* species into two regions, the New World and Old World. Model selection implemented in BioGeoBEARS suggested  
93 DEC+J (54) as the best-fitting model and we used it for all downstream analyses. We used 100 replicates of biogeographical  
94 stochastic maps (55) to estimate the number of times *Formica* dispersed between the Old and New World. We used our  
95 time-calibrated tree with taxon duplicates removed such that each species or putative species was represented by only one  
96 terminal. Results are summarized in Figure S2.

97 **Ancestral state reconstruction.** In order to investigate the evolution of natural history traits in *Formica* and *Polyergus* we  
98 used stochastic character mapping (56). We used the same time-calibrated tree as for biogeographic analyses but with distant  
99 (*Rossomyrmex minuchae* and *Proformica mongolica*) outgroups and *Formica* taxa for which we had insufficient life history data  
100 (see Table S2) pruned.

101 For each species we collected literature and field observation data on nest structure, colony structure, and colony foundation  
102 mode. We discretized nest structure into three categories: i) monodomous, ii) polymorphic: either monodomous or polydomous,  
103 and iii) polymorphic: monodomous, polydomous, or supercolonial. We discretized colony structure into i) monogynous or ii)  
104 polygynous. We assigned species to the polygynous category if they have been observed to be either monogynous or polygynous.  
105 We discretized colony founding mode into five categories: i) independent colony foundation via haplometrosis or pleometrosis,  
106 queen readoption occurs, budding absent or at low frequency, ii) facultative temporary social parasitism with budding at low  
107 frequency, iii) facultative temporary social parasitism with budding at high frequency, iv) obligate temporary social parasitism  
108 and dulosis without budding, v) permanent social parasitism. The coding of character states for each species and references to  
109 original research articles are available in Table S2.

110 We performed ancestral state reconstruction on each of the three characters (nest structure, colony structure, and colony  
111 founding). We first compared three commonly-used variants of the discrete character evolution Mk model (57): all rates equal  
112 (character state change rates are equal for all states), symmetric transition rates (character state change rates are different  
113 for each pair of states), and all rates different (character state change rates are different for each transition). We also fit the  
114 meristic model (assuming characters change in step-wise fashion). We fit these four models using "fit" functions the R package  
115 GEIGER v2.0.6 (58) to all three characters. We used Akaike Information Criterion corrected for sample size (AICc) weights as  
116 computed by the "aic.w" function in Phytools v0.6-44 (59) to see which model fit best. This approach identified the all rates  
117 different model to be the best fit for nest and colony structure and the symmetric model was found best-fitting for colony  
118 founding.

119 Ancestral reconstruction results are found in Figures S3-S5.

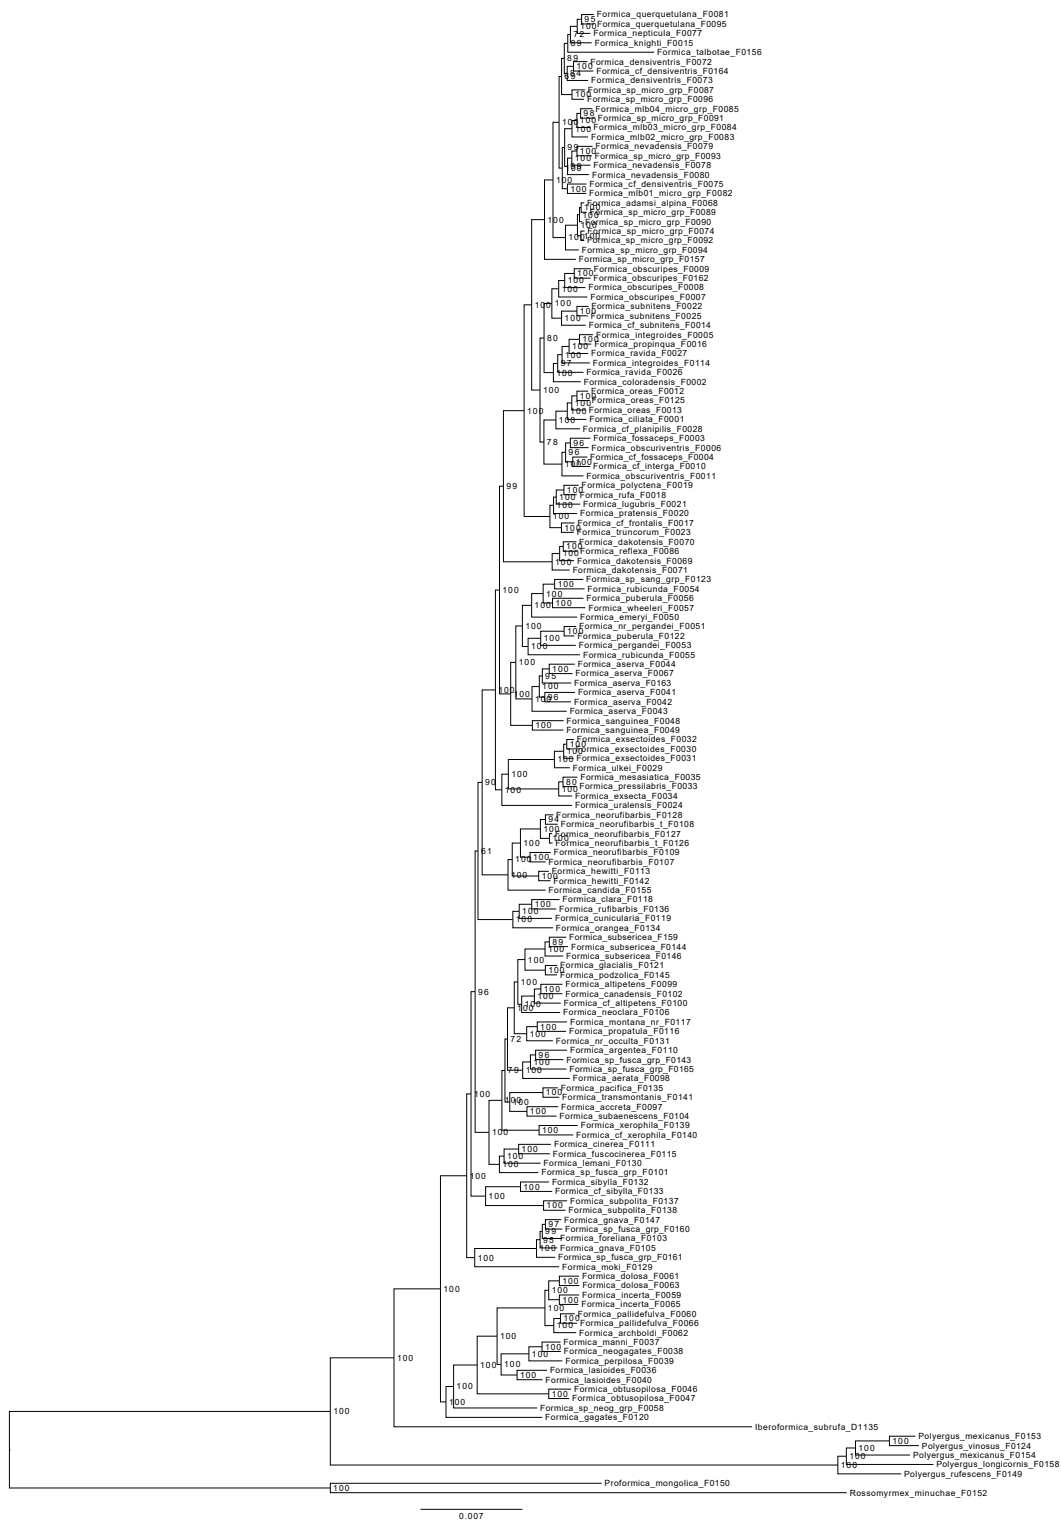

Fig. S1. Phylogram of *Formica* and outgroups from concatenated alignment inferred under maximum likelihood using IQ-TREE. Support in ultrafast bootstrap (values above 95 indicate strong support). Scale in substitutions per site.

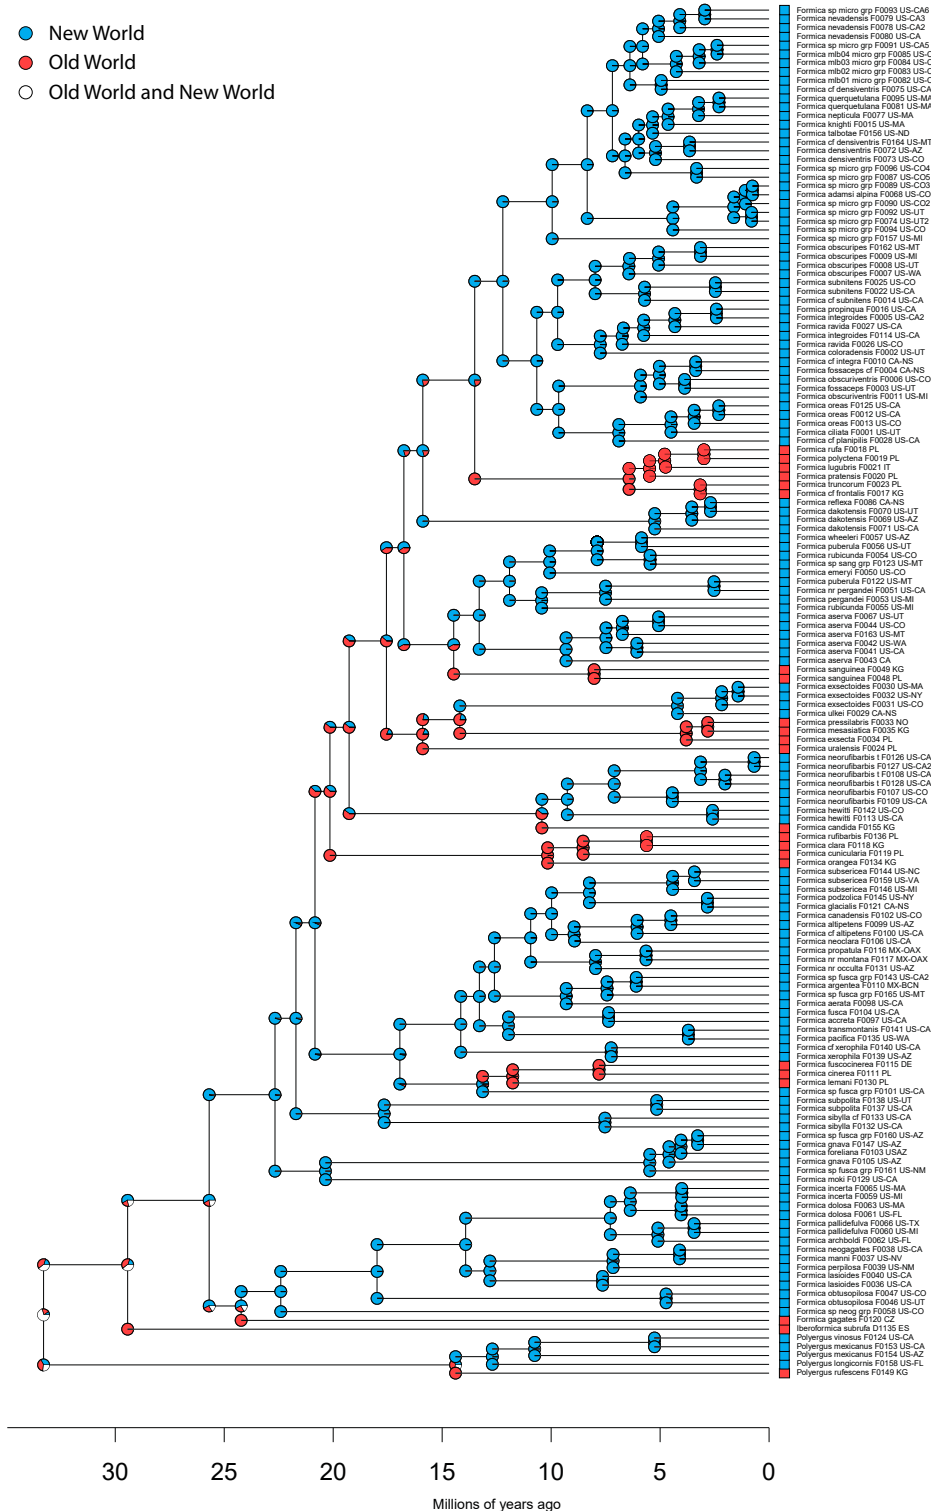

**Fig. S2.** Biogeographic history of *Formica*, *Iberofornica* and *Polyergus*. Pie charts depict relative likelihoods of range estimations from BioGeoBEARS under DEC+J. Pie charts at nodes correspond to ancestral state estimations and charts on the corners correspond to ranges immediately following speciation. Numbers preceded by the letter F indicate extraction code and correspond to identifiers in Table S1. Country and state/province codes as in main text Figure 1.

**Marek L. Borowiec, Stefan P. Cover and Christian Rabeling**

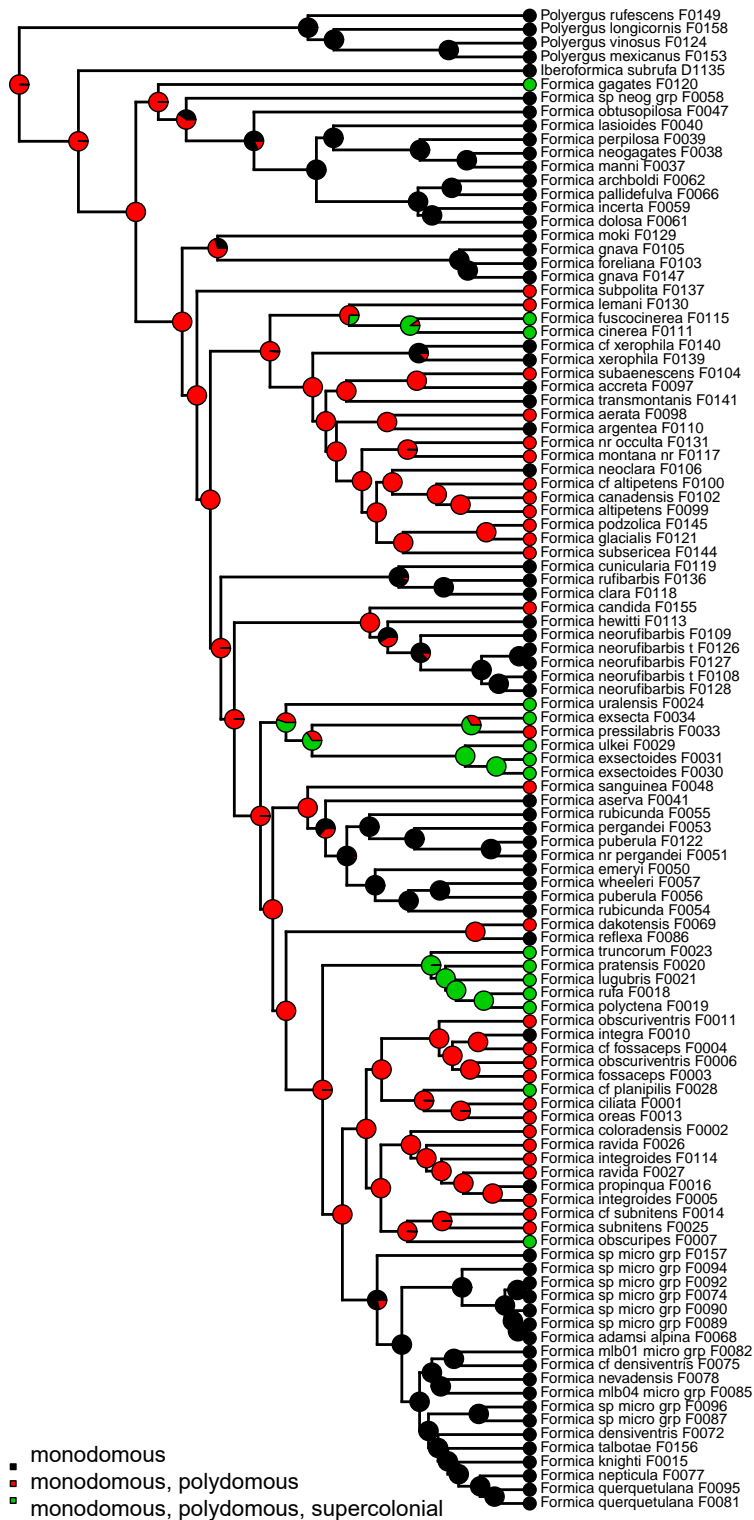

**Fig. S3.** Ancestral state reconstruction of nest structure using stochastic character mapping in Phytools of *Formica* nest structure under all rates different model. Pie charts at nodes correspond to ancestral state estimations and circles at tips correspond to states extant species. Numbers preceded by the letter F indicate extraction code and correspond to identifiers in Tables S1 and S2.

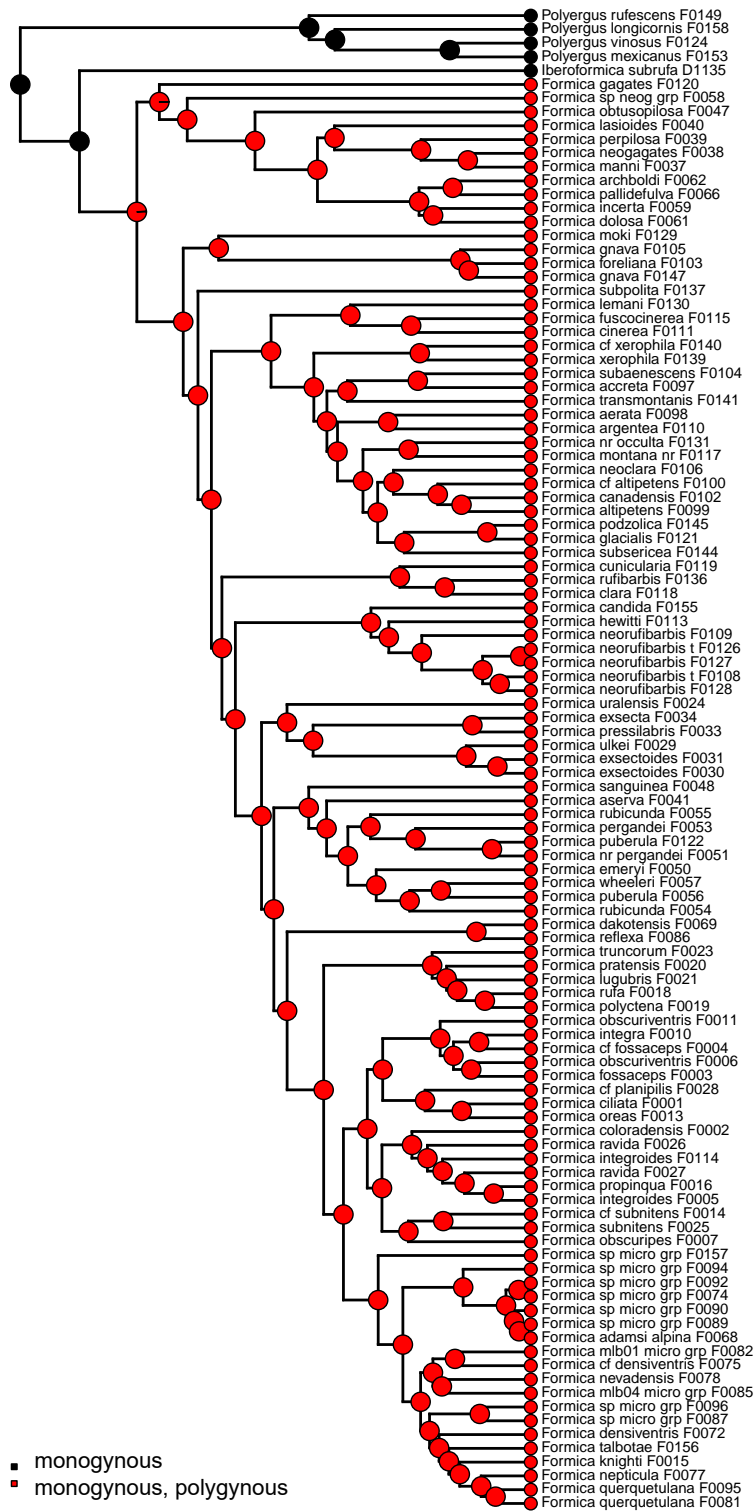

**Fig. S4.** Ancestral state reconstruction of colony structure using stochastic character mapping in Phytools of *Formica* colony structure under all rates different model. Pie charts at nodes correspond to ancestral state estimations and circles at tips correspond to states extant species. Numbers preceded by the letter F indicate extraction code and correspond to identifiers in Tables S1 and S2.

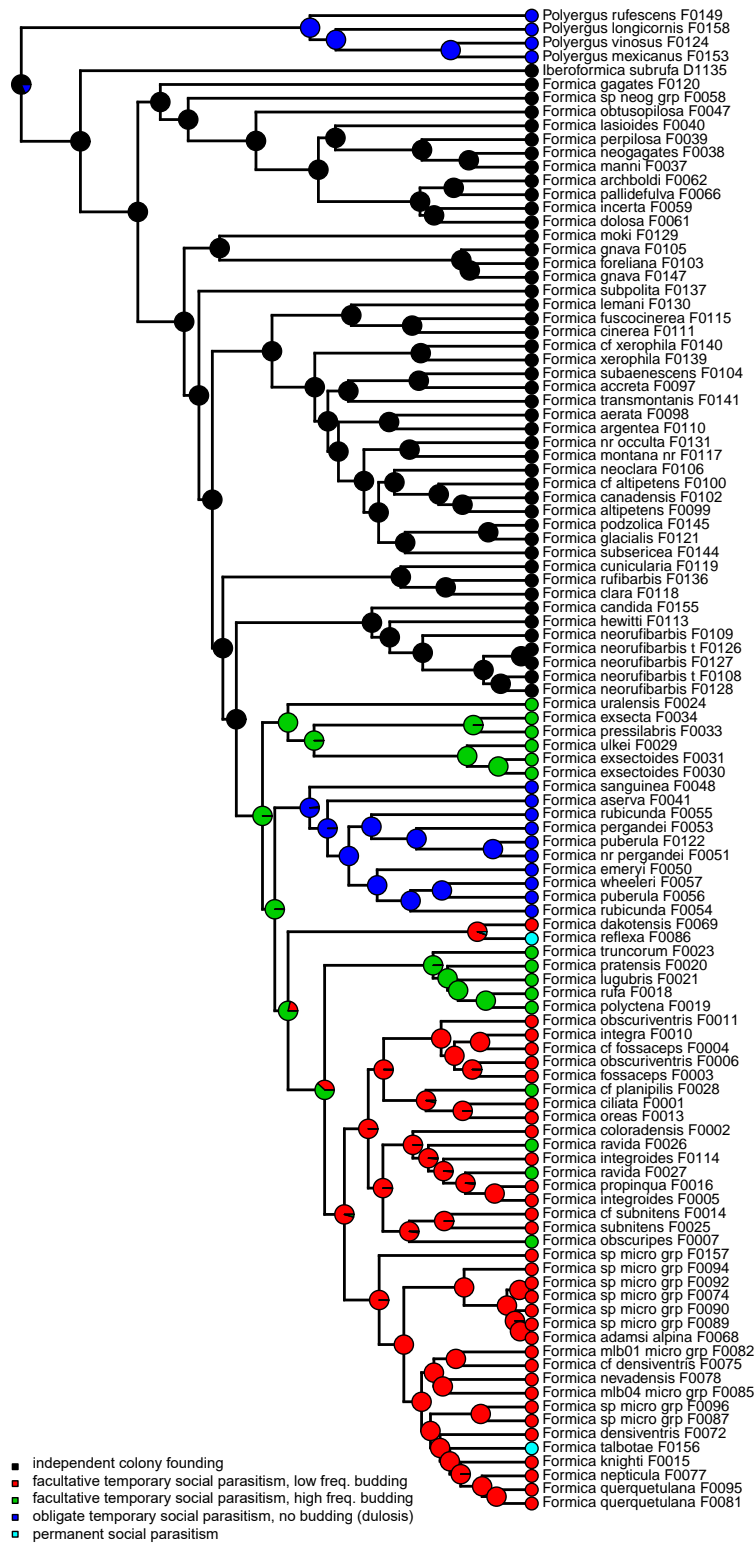

**Fig. S5.** Ancestral state reconstruction of colony founding mode using stochastic character mapping in Phytools of *Formica* colony founding under symmetrical rates model. Pie charts at the nodes correspond to ancestral state estimations and circles at tips correspond to states extant species. Numbers preceded by the letter F indicate extraction code and correspond to identifiers in Table S1 and S2.



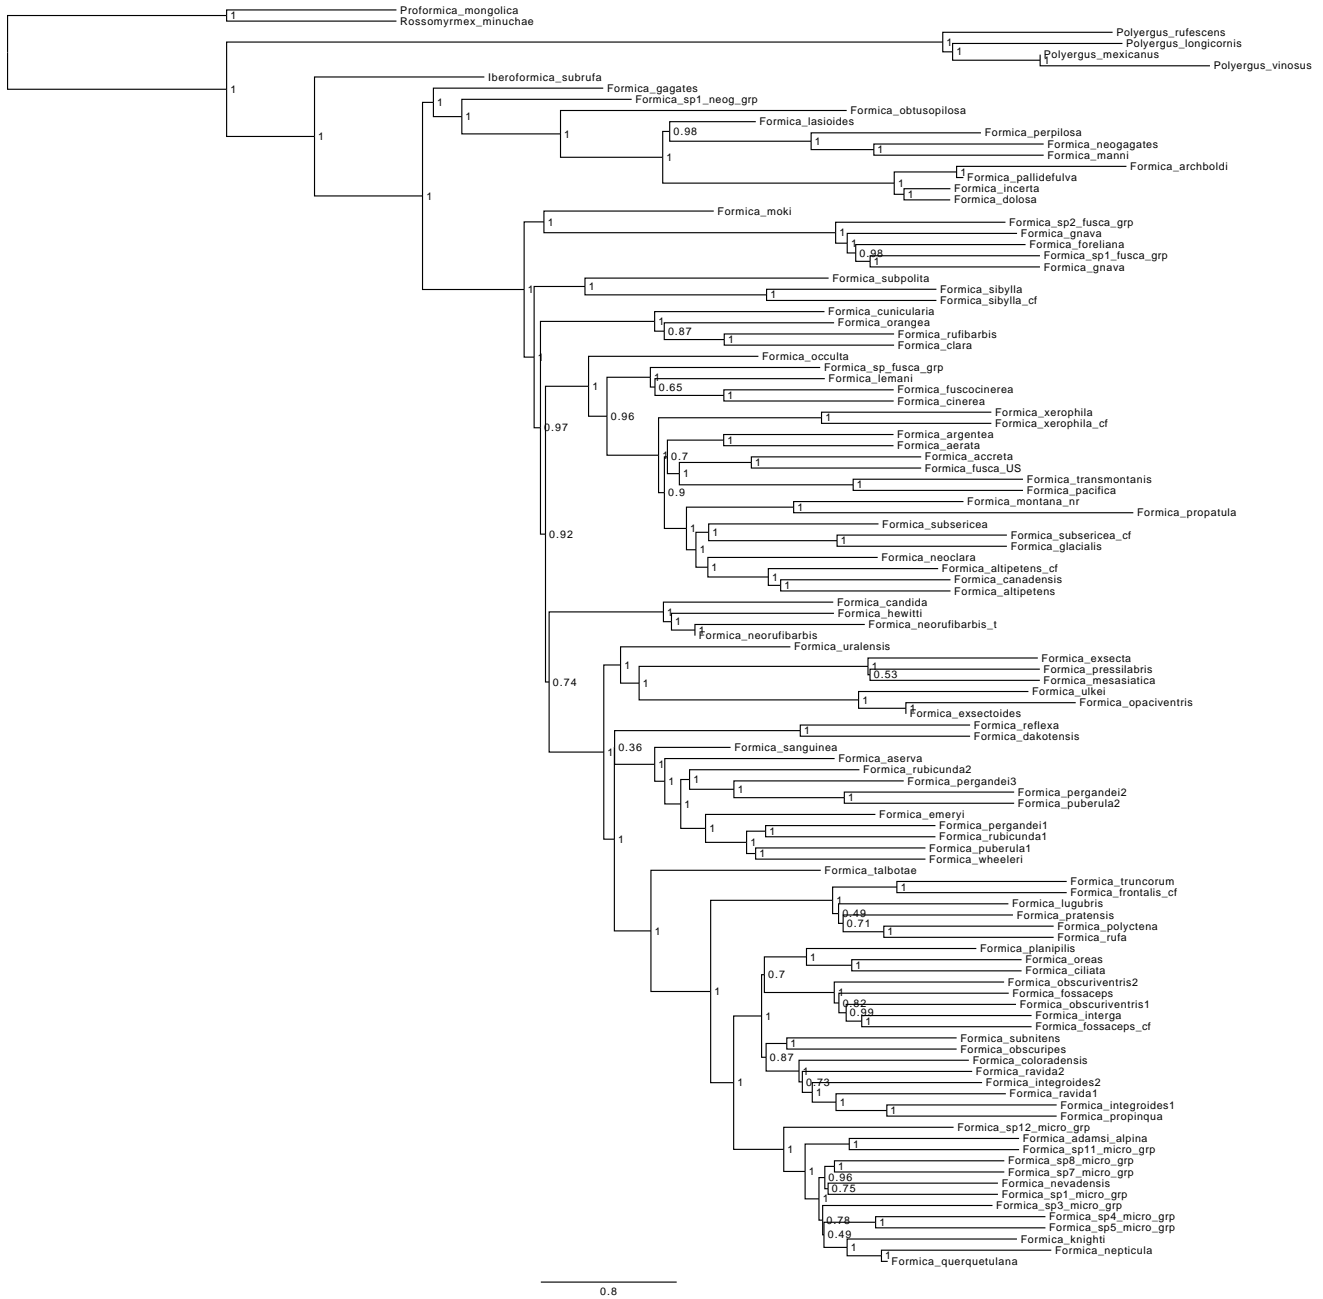

**Fig. S6.** Species tree inferred under coalescent using ASTRAL-III and 1,733 weighted supergene trees identified using statistical binning pipeline. Support is expressed in local posterior probability and branch lengths are in coalescent units.

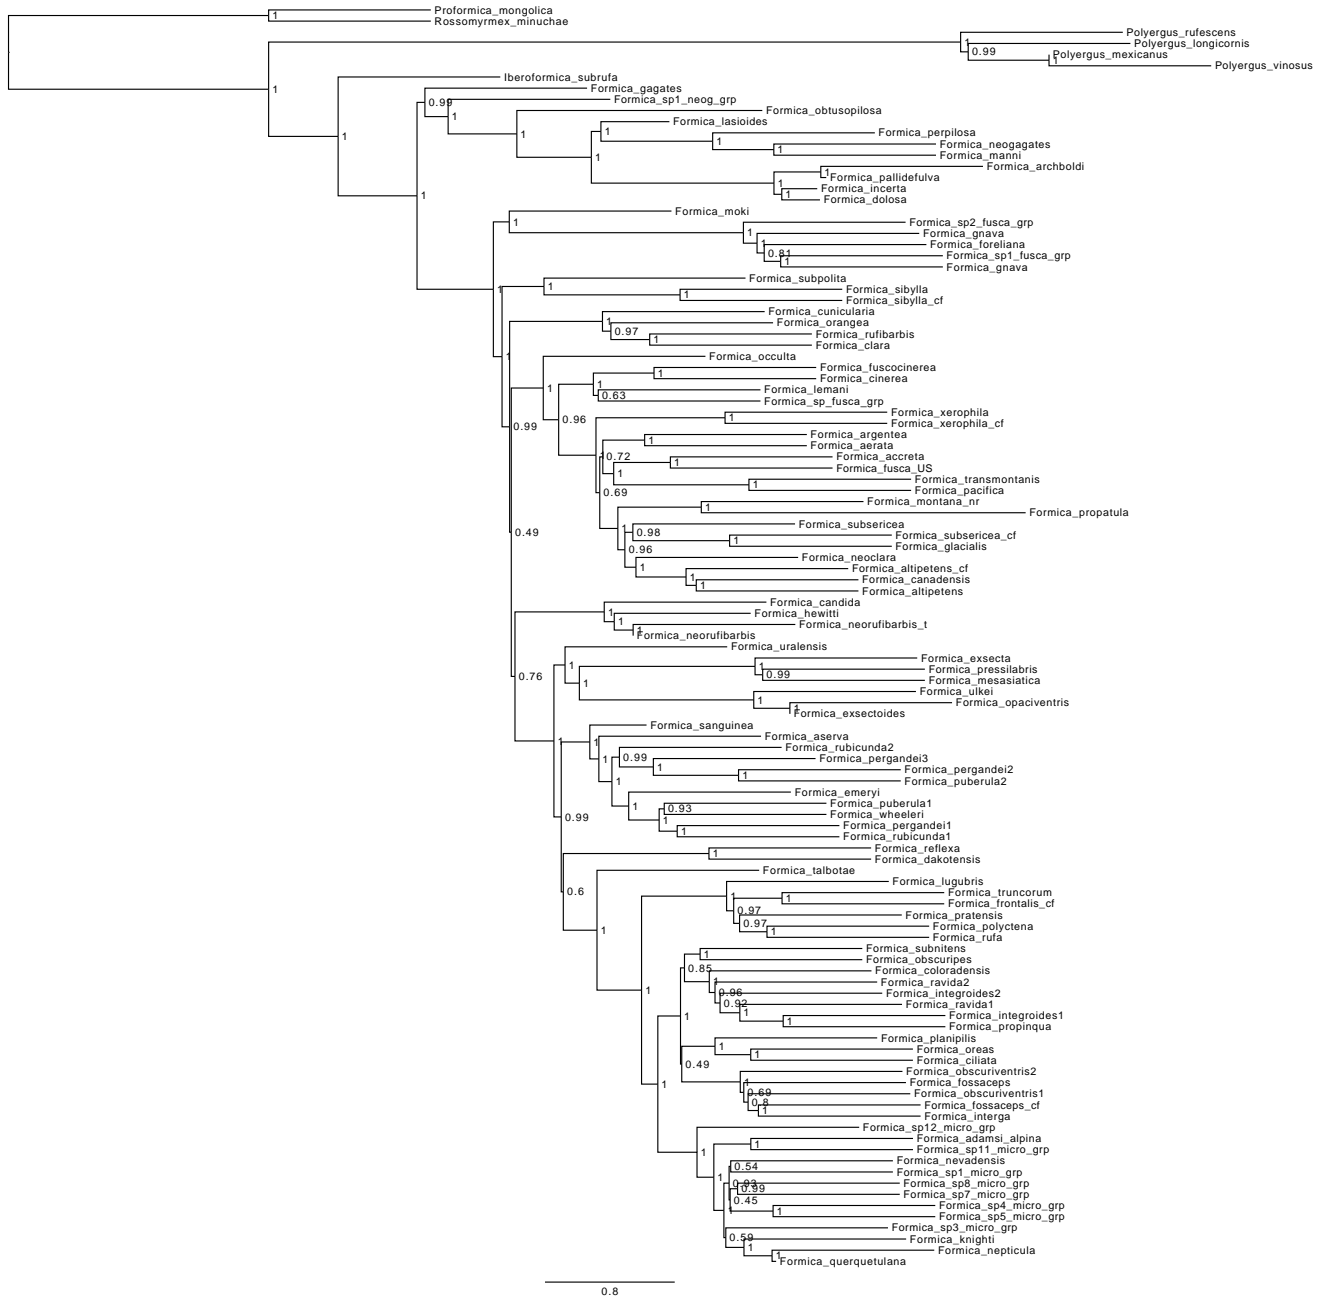

**Fig. S7.** Species tree inferred under coalescent using ASTRAL-III and all 2,242 individual UCE locus trees. Support is expressed in local posterior probability and branch lengths are in coalescent units.

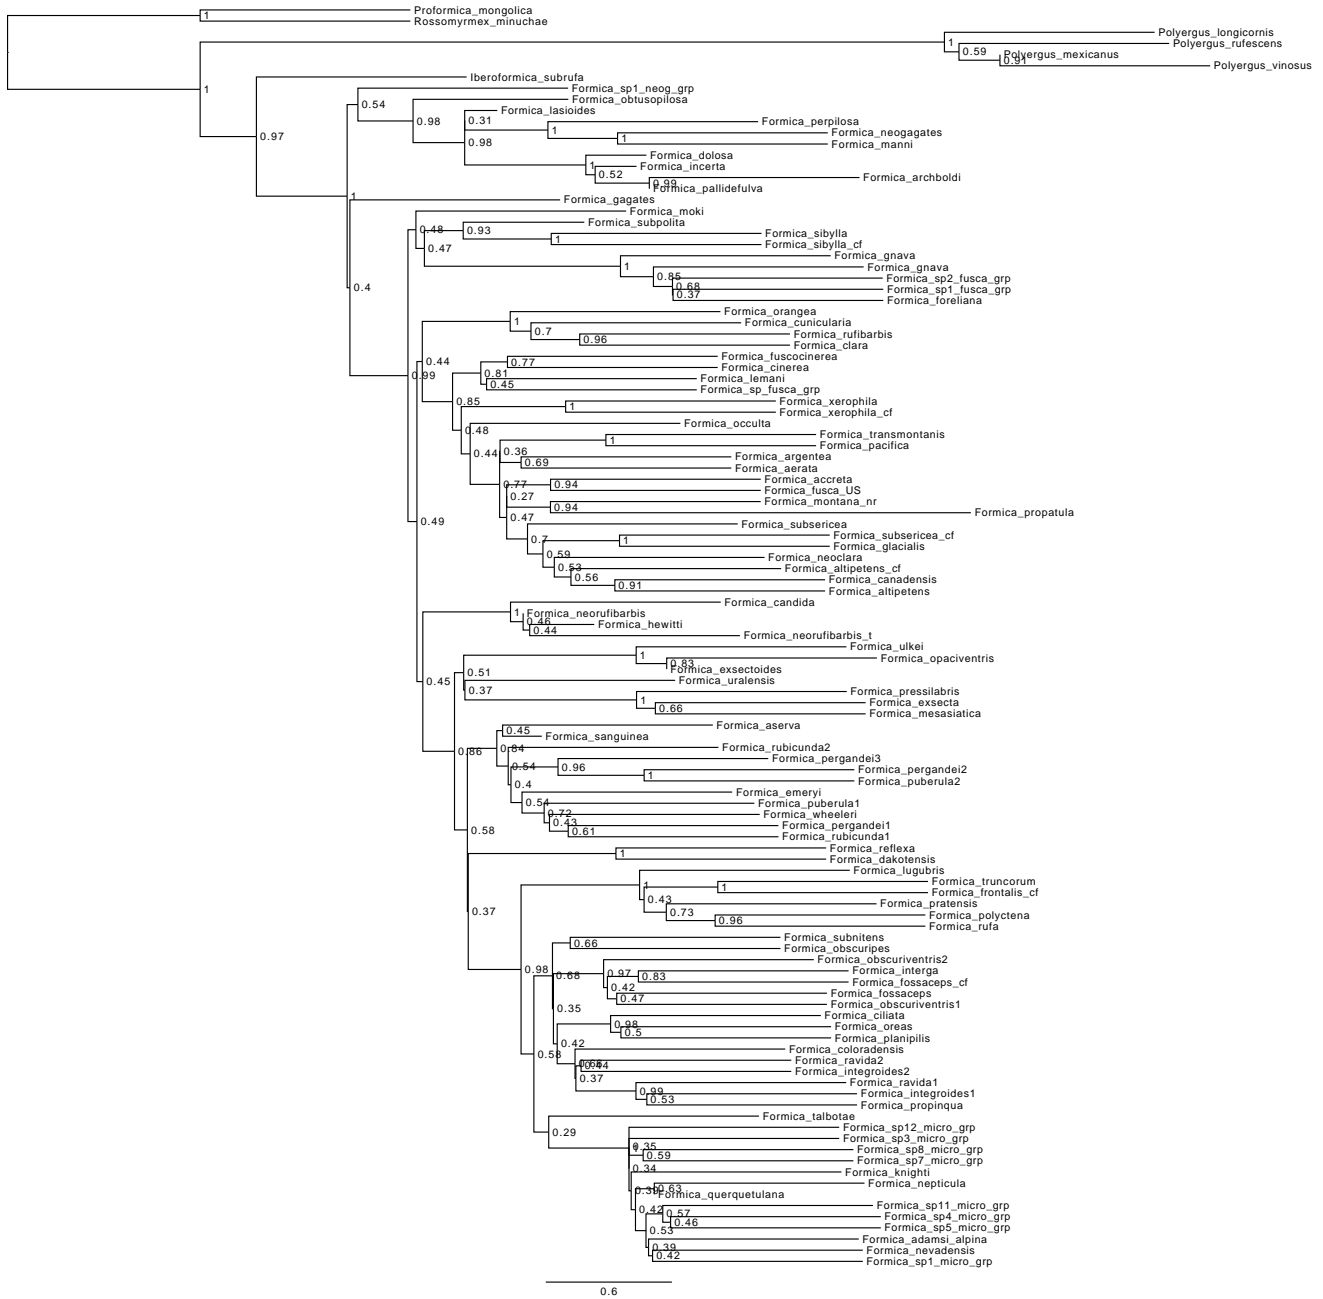

**Fig. S8.** Species tree inferred under coalescent using ASTRAL-III and 67 individual UCE locus trees for which at least 50 % of sequence length was available for *Formica talbotae*. Support is expressed in local posterior probability and branch lengths are in coalescent units.

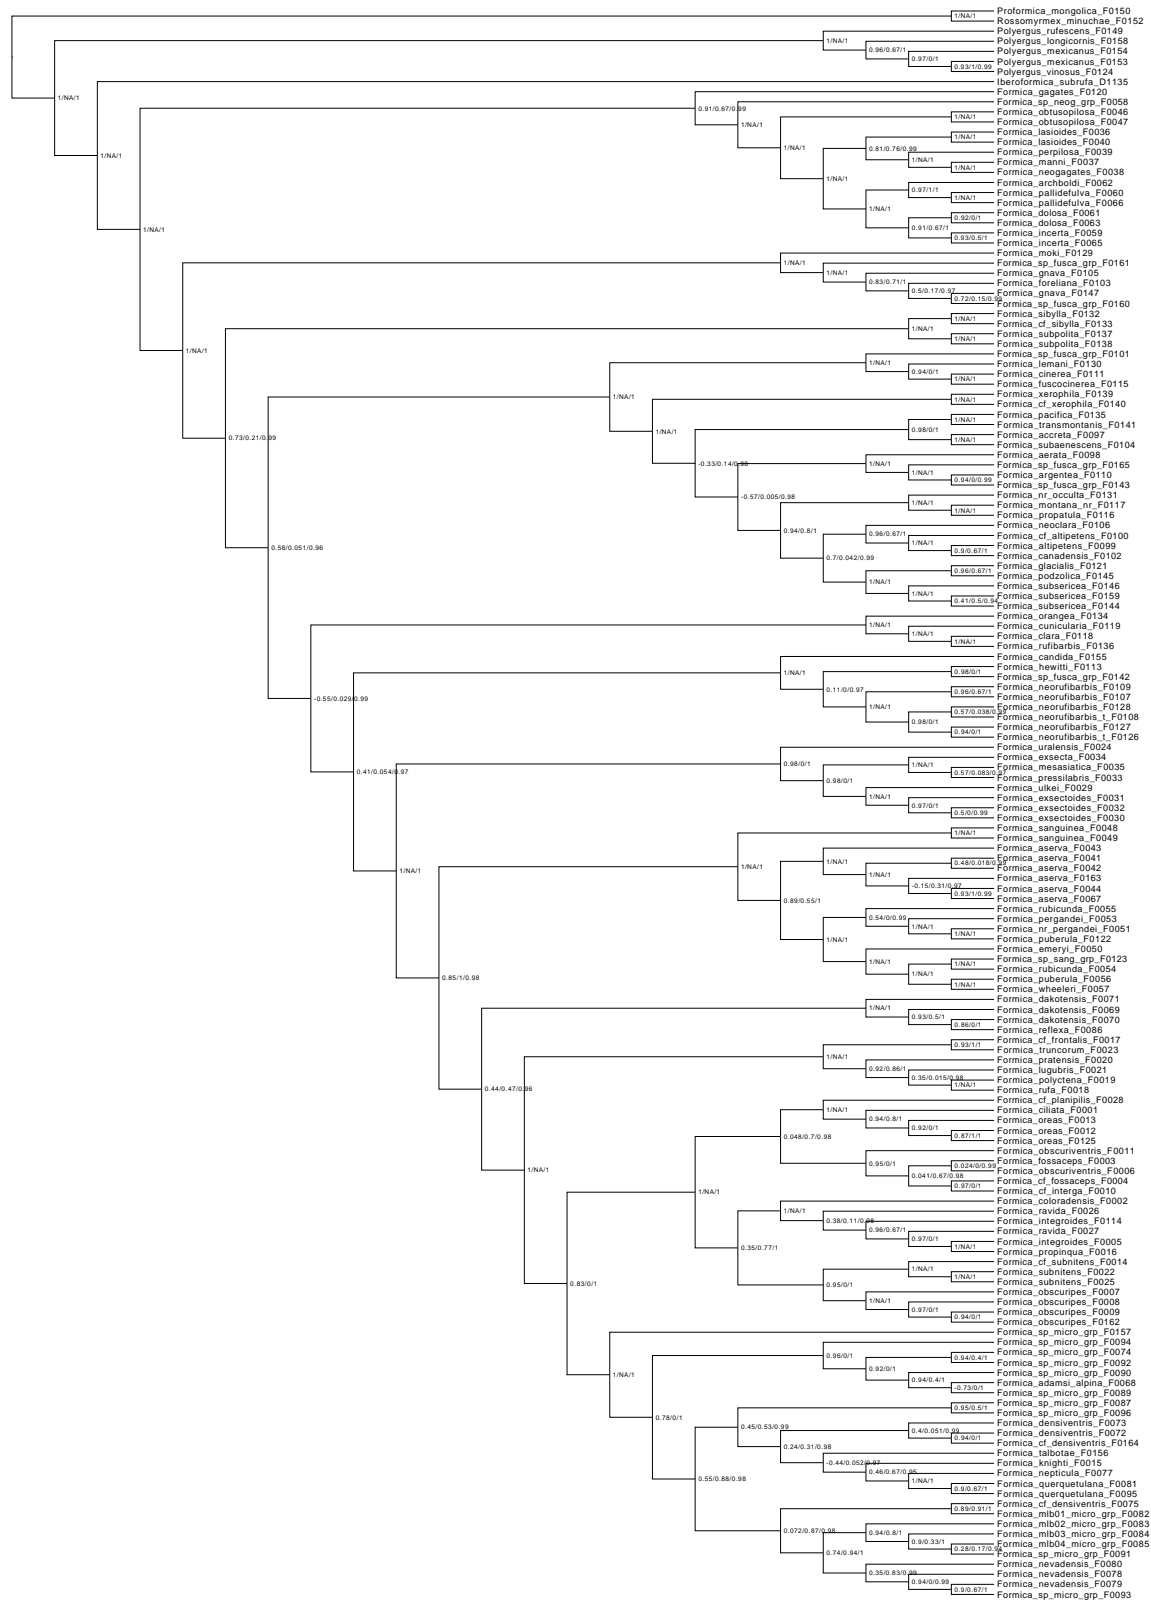

**Fig. S9.** Support from quartet sampling analyses. The values are: quartet concordance score (QC) / quartet differential score (QD) / quartet informativeness score (QI). Briefly, QC measures how often the concordant quartet topologies are inferred over discordant quartets in different replicates, with a value equal 1 when all replicates result in concordant topology, QD measures whether frequencies of two discordant topologies are equal (=1) or skewed (<1), and QI measures what proportion of replicates were informative. Contrast values for colony dependent clade or monophyly of *difficilis* group (1/NA/1), meaning that all replicates were informative and resulted in the same topology with support for placement of clade of Palearctic species related to *Formica rufibarbis* (-0.55/0.029/0.99) indicating that discordant topologies were inferred more often than those concordant with the input tree, that quartet topologies were highly skewed, but most replicates were informative. The former indicates maximal support, while the latter shows that the position of this clade within the "fusca grade" is highly uncertain, perhaps due to incomplete lineage sorting.

**Table S1. Voucher specimens used in this study. Detailed collection data can be accessed at Zenodo (DOI: [10.5281/zenodo.4341310](https://doi.org/10.5281/zenodo.4341310)).**

| Extraction ID | Taxon                  | Specimen ID  | Country | Latitude | Longitude  |
|---------------|------------------------|--------------|---------|----------|------------|
| D1135         | Iberoformica subrufa   | ASU-SIBR2148 | ES      | 37.185   | -3.485     |
| F0001         | Formica ciliata        | ASU-SIBR2001 | US      | 38.26117 | -112.51433 |
| F0002         | Formica coloradensis   | ASU-SIBR2002 | US      | 38.42233 | -109.18017 |
| F0003         | Formica fossiceps      | ASU-SIBR2003 | US      | 38.39467 | -109.165   |
| F0004         | Formica cf fossiceps   | ASU-SIBR2004 | CA      | 44.53050 | -64.31912  |
| F0005         | Formica integroides    | ASU-SIBR2005 | US      | 38.67525 | -119.99428 |
| F0006         | Formica obscuriventris | ASU-SIBR2006 | US      | 39.12017 | -107.44767 |
| F0007         | Formica obscuripes     | ASU-SIBR2007 | US      | 48.1728  | -122.6714  |
| F0008         | Formica obscuripes     | ASU-SIBR2008 | US      | 38.23367 | -112.44917 |
| F0009         | Formica obscuripes     | ASU-SIBR2009 | US      | 42.44788 | -84.01688  |
| F0010         | Formica cf interga     | ASU-SIBR2010 | CA      | 44.68839 | -63.66808  |
| F0011         | Formica obscuriventris | ASU-SIBR2011 | US      | 42.45103 | -84.01878  |
| F0012         | Formica oreas          | ASU-SIBR2012 | US      | 38.67577 | -119.99431 |
| F0013         | Formica oreas          | ASU-SIBR2013 | US      | 38.84233 | -106.53817 |
| F0014         | Formica cf subnitens   | ASU-SIBR2014 | US      | 38.67757 | -119.98343 |
| F0015         | Formica knighti        | ASU-SIBR2015 | US      | 41.8652  | -70.64777  |
| F0016         | Formica propinqua      | ASU-SIBR2016 | US      | 39.44008 | -120.32349 |
| F0017         | Formica cf frontalis   | ASU-SIBR2017 | KG      | 42.8     | 77.47      |
| F0018         | Formica rufa           | ASU-SIBR2018 | PL      | 51.155   | 16.985     |
| F0019         | Formica polycтена      | ASU-SIBR2019 | PL      | 51.39    | 17.5       |
| F0020         | Formica pratensis      | ASU-SIBR2020 | PL      | 51.3867  | 16.805     |
| F0021         | Formica lugubris       | ASU-SIBR2021 | IT      | 46.586   | 12.105     |
| F0022         | Formica subnitens      | ASU-SIBR2022 | US      | 39.82308 | -120.13748 |
| F0023         | Formica truncorum      | ASU-SIBR2023 | PL      | 50.33    | 16.55      |
| F0024         | Formica uralensis      | ASU-SIBR2024 | PL      | 51.38    | 23.55      |
| F0025         | Formica subnitens      | ASU-SIBR2025 | US      | 39.591   | -108.818   |
| F0026         | Formica ravida         | ASU-SIBR2026 | US      | 39.1695  | -107.94817 |
| F0027         | Formica ravida         | ASU-SIBR2027 | US      | 39.43221 | -120.24265 |
| F0028         | Formica cf planipilis  | ASU-SIBR2028 | US      | 40.72538 | -120.20708 |
| F0029         | Formica ulkei          | ASU-SIBR2029 | CA      | 44.49808 | -63.92692  |
| F0030         | Formica exsectoides    | ASU-SIBR2030 | US      | 41.87383 | -70.65183  |
| F0031         | Formica exsectoides    | ASU-SIBR2031 | US      | 38.73367 | -104.896   |
| F0032         | Formica exsectoides    | ASU-SIBR2032 | US      | 43.01548 | -77.57365  |
| F0033         | Formica pressilabris   | ASU-SIBR2033 | SE      | 68.3381  | 18.7639    |
| F0034         | Formica exsecta        | ASU-SIBR2034 | PL      | 50.577   | 22.984     |
| F0035         | Formica mesasiatica    | ASU-SIBR2035 | KG      | 42.33    | 78.24      |
| F0036         | Formica lasioides      | ASU-SIBR2036 | US      | 33.18522 | -116.28849 |
| F0037         | Formica manni          | ASU-SIBR2037 | US      | 41.63632 | -119.84183 |
| F0038         | Formica neogagates     | ASU-SIBR2038 | US      | 39.42998 | -120.24087 |
| F0039         | Formica perpilosa      | ASU-SIBR2039 | US      | 31.83945 | -109.03615 |
| F0040         | Formica lasioides      | ASU-SIBR2040 | US      | 39.43163 | -120.24059 |
| F0041         | Formica aserva         | ASU-SIBR2041 | US      | 37.68319 | -119.17078 |
| F0042         | Formica aserva         | ASU-SIBR2042 | US      | 48.66648 | -122.96887 |
| F0043         | Formica aserva         | ASU-SIBR2043 | CA      | 44.46380 | -63.58094  |
| F0044         | Formica aserva         | ASU-SIBR2044 | US      | 38.81400 | -106.28217 |
| F0046         | Formica obtusopilosa   | ASU-SIBR2046 | US      | 38.71217 | -111.94833 |
| F0047         | Formica obtusopilosa   | ASU-SIBR2047 | US      | 39.50633 | -108.76217 |
| F0048         | Formica sanguinea      | ASU-SIBR2048 | PL      | 50.448   | 19.995     |
| F0049         | Formica sanguinea      | ASU-SIBR2049 | KG      | 42.67    | 77.18      |
| F0050         | Formica emeryi         | ASU-SIBR2050 | US      | 39.03167 | -104.79633 |
| F0051         | Formica nr pergandei   | ASU-SIBR2051 | US      | 39.21529 | -121.04322 |
| F0053         | Formica pergandei      | ASU-SIBR2053 | US      | 42.45278 | -84.01939  |
| F0054         | Formica rubicunda      | ASU-SIBR2054 | US      | 39.03033 | -105.44217 |
| F0055         | Formica rubicunda      | ASU-SIBR2055 | US      | 42.45919 | -84.01429  |
| F0056         | Formica puberula       | ASU-SIBR2056 | US      | 37.88800 | -109.45433 |
| F0057         | Formica wheeleri       | ASU-SIBR2057 | US      | 31.91433 | -109.271   |
| F0058         | Formica sp neog grp    | ASU-SIBR2058 | US      | 37.84367 | -109.36967 |
| F0059         | Formica incerta        | ASU-SIBR2059 | US      | 42.45151 | -84.01901  |
| F0060         | Formica pallidefulva   | ASU-SIBR2060 | US      | 42.45948 | -84.0256   |
| F0061         | Formica dolosa         | ASU-SIBR2061 | US      | 30.35995 | -84.41848  |
| F0062         | Formica archboldi      | ASU-SIBR2062 | US      | 30.35995 | -84.41848  |
| F0063         | Formica dolosa         | ASU-SIBR2063 | US      | 41.81444 | -70.66315  |
| F0065         | Formica incerta        | ASU-SIBR2065 | US      | 41.8652  | -70.64777  |

Table S1. Voucher specimens used in this study, continued.

| Extraction ID | Taxon                          | Specimen ID  | Country | Latitude | Longitude  |
|---------------|--------------------------------|--------------|---------|----------|------------|
| F0066         | <i>Formica pallidefulva</i>    | ASU-SIBR2066 | US      | 30.2275  | -98.1788   |
| F0067         | <i>Formica aserva</i>          | ASU-SIBR2067 | US      | 38.66283 | -111.94117 |
| F0068         | <i>Formica adamsi alpina</i>   | ASU-SIBR2068 | US      | 38.39317 | -107.19683 |
| F0069         | <i>Formica dakotensis</i>      | ASU-SIBR2069 | US      | 34.02867 | -109.1855  |
| F0070         | <i>Formica dakotensis</i>      | ASU-SIBR2070 | US      | 38.63500 | -111.94817 |
| F0071         | <i>Formica dakotensis</i>      | ASU-SIBR2071 | US      | 39.41344 | -120.32162 |
| F0072         | <i>Formica densiventris</i>    | ASU-SIBR2072 | US      | 32.65729 | -109.85841 |
| F0073         | <i>Formica densiventris</i>    | ASU-SIBR2073 | US      | 39.75867 | -108.78783 |
| F0074         | <i>Formica sp micro grp</i>    | ASU-SIBR2074 | US      | 38.64883 | -111.94983 |
| F0075         | <i>Formica cf densiventris</i> | ASU-SIBR2075 | US      | 38.21541 | -119.74609 |
| F0077         | <i>Formica nepticula</i>       | ASU-SIBR2077 | US      | 41.87367 | -70.65233  |
| F0078         | <i>Formica nevadensis</i>      | ASU-SIBR2078 | US      | 39.35788 | -122.74716 |
| F0079         | <i>Formica nevadensis</i>      | ASU-SIBR2079 | US      | 41.56204 | -123.21177 |
| F0080         | <i>Formica nevadensis</i>      | ASU-SIBR2080 | US      | 39.41318 | -120.32038 |
| F0081         | <i>Formica querquetulana</i>   | ASU-SIBR2081 | US      | 41.87383 | -70.65183  |
| F0082         | <i>Formica mlb01 micro grp</i> | ASU-SIBR2082 | US      | 37.21317 | -118.64671 |
| F0083         | <i>Formica mlb02 micro grp</i> | ASU-SIBR2083 | US      | 40.94628 | -123.0427  |
| F0084         | <i>Formica mlb03 micro grp</i> | ASU-SIBR2084 | US      | 39.29111 | -120.67918 |
| F0085         | <i>Formica mlb04 micro grp</i> | ASU-SIBR2085 | US      | 39.40022 | -120.55818 |
| F0086         | <i>Formica reflexa</i>         | ASU-SIBR2086 | CA      | 44.53050 | -64.31912  |
| F0087         | <i>Formica sp micro grp</i>    | ASU-SIBR2087 | US      | 38.42033 | -107.62783 |
| F0089         | <i>Formica sp micro grp</i>    | ASU-SIBR2089 | US      | 38.18833 | -107.62067 |
| F0090         | <i>Formica sp micro grp</i>    | ASU-SIBR2090 | US      | 38.83800 | -106.56167 |
| F0091         | <i>Formica sp micro grp</i>    | ASU-SIBR2091 | US      | 38.83800 | -106.56167 |
| F0092         | <i>Formica sp micro grp</i>    | ASU-SIBR2092 | US      | 38.64983 | -111.95083 |
| F0093         | <i>Formica sp micro grp</i>    | ASU-SIBR2093 | US      | 41.56204 | -123.21177 |
| F0094         | <i>Formica sp micro grp</i>    | ASU-SIBR2094 | US      | 38.838   | -106.56167 |
| F0095         | <i>Formica querquetulana</i>   | ASU-SIBR2095 | US      | 41.87167 | -70.651    |
| F0096         | <i>Formica sp micro grp</i>    | ASU-SIBR2096 | US      | 39.04167 | -104.6615  |
| F0097         | <i>Formica accreta</i>         | ASU-SIBR2097 | US      | 39.30805 | -120.66831 |
| F0098         | <i>Formica aerata</i>          | ASU-SIBR2098 | US      | 37.80145 | -118.5299  |
| F0099         | <i>Formica altipetens</i>      | ASU-SIBR2099 | US      | 33.90683 | -109.1245  |
| F0100         | <i>Formica cf altipetens</i>   | ASU-SIBR2100 | US      | 38.6739  | -119.99411 |
| F0101         | <i>Formica sp fusca grp</i>    | ASU-SIBR2101 | US      | 37.38932 | -118.76612 |
| F0102         | <i>Formica canadensis</i>      | ASU-SIBR2102 | US      | 39.12017 | -107.44    |
| F0103         | <i>Formica foreliana</i>       | ASU-SIBR2103 | US      | 31.43100 | -111.16967 |
| F0104         | <i>Formica subaenescens</i>    | ASU-SIBR2104 | US      | 37.92051 | -122.57471 |
| F0105         | <i>Formica gnava</i>           | ASU-SIBR2105 | US      | 32.64983 | -109.81717 |
| F0106         | <i>Formica neoclara</i>        | ASU-SIBR2106 | US      | 39.50332 | -120.24157 |
| F0107         | <i>Formica neurufibarbis</i>   | ASU-SIBR2107 | US      | 38.71467 | -106.223   |
| F0108         | <i>Formica neurufibarbis t</i> | ASU-SIBR2108 | US      | 36.67239 | -118.34463 |
| F0109         | <i>Formica neurufibarbis</i>   | ASU-SIBR2109 | US      | 39.42505 | -120.24285 |
| F0110         | <i>Formica argentea</i>        | ASU-SIBR2110 | MX      | 31.00261 | -115.5497  |
| F0111         | <i>Formica cinerea</i>         | ASU-SIBR2111 | PL      | 51.39    | 17.5       |
| F0113         | <i>Formica hewitti</i>         | ASU-SIBR2113 | US      | 38.67984 | -119.98373 |
| F0114         | <i>Formica integroides</i>     | ASU-SIBR2114 | US      | 40.11490 | -120.32086 |
| F0115         | <i>Formica fuscocinerea</i>    | ASU-SIBR2115 | DE      | 48.16452 | 11.50075   |
| F0116         | <i>Formica propatula</i>       | ASU-SIBR2116 | MX      | 17.1873  | -96.62085  |
| F0117         | <i>Formica montana nr</i>      | ASU-SIBR2117 | MX      | 17.61752 | -96.36799  |
| F0118         | <i>Formica clara</i>           | ASU-SIBR2118 | KG      | 42.66    | 77.47      |
| F0119         | <i>Formica cunicularia</i>     | ASU-SIBR2119 | PL      | 51.175   | 17.068     |
| F0120         | <i>Formica gagates</i>         | ASU-SIBR2120 | CZ      | 48.869   | 16.652     |
| F0121         | <i>Formica glacialis</i>       | ASU-SIBR2121 | CA      | 44.98735 | -64.06002  |
| F0122         | <i>Formica puberula</i>        | ASU-SIBR2122 | US      | 45.0446  | -110.68078 |
| F0123         | <i>Formica sp sang grp</i>     | ASU-SIBR2123 | US      | 45.13217 | -111.06283 |
| F0124         | <i>Polyergus vinosus</i>       | ASU-SIBR2124 | US      | 32.85323 | -116.43738 |
| F0125         | <i>Formica oreas</i>           | ASU-SIBR2125 | US      | 38.05273 | -119.32138 |
| F0126         | <i>Formica neurufibarbis t</i> | ASU-SIBR2126 | US      | 38.06165 | -119.34966 |
| F0127         | <i>Formica neurufibarbis</i>   | ASU-SIBR2127 | US      | 38.06207 | -119.34888 |
| F0128         | <i>Formica neurufibarbis</i>   | ASU-SIBR2128 | US      | 38.04167 | -119.29781 |
| F0129         | <i>Formica moki</i>            | ASU-SIBR2129 | US      | 38.9     | -121.02    |
| F0130         | <i>Formica lemani</i>          | ASU-SIBR2130 | PL      | 50.33    | 16.55      |

**Table S1. Voucher specimens used in this study, continued.**

| Extraction ID | Taxon                          | Specimen ID  | Country | Latitude | Longitude  |
|---------------|--------------------------------|--------------|---------|----------|------------|
| F0131         | <i>Formica nr occulta</i>      | ASU-SIBR2131 | US      | 31.91375 | -109.26757 |
| F0132         | <i>Formica sibylla</i>         | ASU-SIBR2132 | US      | 39.43221 | -120.24258 |
| F0133         | <i>Formica cf sibylla</i>      | ASU-SIBR2133 | US      | 39.431   | -120.331   |
| F0134         | <i>Formica orangea</i>         | ASU-SIBR2134 | KG      | 42.6     | 75.85      |
| F0135         | <i>Formica pacifica</i>        | ASU-SIBR2135 | US      | 48.1728  | -122.6714  |
| F0136         | <i>Formica rufibarbis</i>      | ASU-SIBR2136 | PL      | 52.76917 | 14.30778   |
| F0137         | <i>Formica subpolita</i>       | ASU-SIBR2137 | US      | 39.50444 | -120.23817 |
| F0138         | <i>Formica subpolita</i>       | ASU-SIBR2138 | US      | 38.72450 | -112.20717 |
| F0139         | <i>Formica xerophila</i>       | ASU-SIBR2139 | US      | 35.80350 | -112.11767 |
| F0140         | <i>Formica cf xerophila</i>    | ASU-SIBR2140 | US      | 38.85876 | -122.41834 |
| F0141         | <i>Formica transmontanis</i>   | ASU-SIBR2141 | US      | 39.188   | -123.757   |
| F0142         | <i>Formica sp fusca grp</i>    | ASU-SIBR2142 | US      | 38.83767 | -106.55933 |
| F0143         | <i>Formica sp fusca grp</i>    | ASU-SIBR2143 | US      | 39.21533 | -121.04019 |
| F0144         | <i>Formica subsericea</i>      | ASU-SIBR2144 | US      | 35.695   | -78.69688  |
| F0145         | <i>Formica podzolica</i>       | ASU-SIBR2145 | US      | 43.01616 | -77.57632  |
| F0146         | <i>Formica subsericea</i>      | ASU-SIBR2146 | US      | 42.45103 | -84.01885  |
| F0147         | <i>Formica gnava</i>           | ASU-SIBR2147 | US      | 31.93200 | -109.17783 |
| F0149         | <i>Polyergus rufescens</i>     | ASU-SIBR2149 | KG      | 42.67    | 77.18      |
| F0150         | <i>Proformica mongolica</i>    | ASU-SIBR2150 | KG      | 42.77    | 74.66      |
| F0152         | <i>Rossomyrmex minuchae</i>    | ASU-SIBR2152 | ES      | 36.89    | -2.78      |
| F0153         | <i>Polyergus mexicanus</i>     | ASU-SIBR2153 | US      | 39.41591 | -120.31704 |
| F0154         | <i>Polyergus mexicanus</i>     | ASU-SIBR2154 | US      | 31.90882 | -109.25211 |
| F0155         | <i>Formica candida</i>         | ASU-SIBR2155 | KG      | 42.08    | 76.73      |
| F0156         | <i>Formica talbotae</i>        | ASU-SIBR2156 | US      | 43.38    | -95.185    |
| F0157         | <i>Formica sp micro grp</i>    | ASU-SIBR2157 | US      | 42.45947 | -84.02559  |
| F0158         | <i>Polyergus longicornis</i>   | ASU-SIBR2158 | US      | 30.35995 | -84.41848  |
| F0159         | <i>Formica subsericea</i>      | ASU-SIBR2159 | US      | 38.9879  | -77.2495   |
| F0160         | <i>Formica sp fusca grp</i>    | ASU-SIBR2160 | US      | 31.8729  | -109.23504 |
| F0161         | <i>Formica sp fusca grp</i>    | ASU-SIBR2161 | US      | 32.59105 | -107.97398 |
| F0162         | <i>Formica obscuripes</i>      | ASU-SIBR2162 | US      | 48.03381 | -110.22798 |
| F0163         | <i>Formica aserva</i>          | ASU-SIBR2163 | US      | 46.7059  | -114.53617 |
| F0164         | <i>Formica cf densiventris</i> | ASU-SIBR2164 | US      | 38.10233 | -111.33653 |
| F0165         | <i>Formica sp fusca grp</i>    | ASU-SIBR2165 | US      | 48.52302 | -113.3808  |





- 121 1. WS Creighton, The ants of North America. *Bull. Mus. Comp. Zool.* **104**, 1–585 (1950).
- 122 2. A Francoeur, Révision taxonomique des espèces néarctiques du groupe *fusca*, genre *Formica* (Formicidae, Hymenoptera).
- 123 *Mémoires de la Société Entomol. du Québec*, 1–316 (1973).
- 124 3. RR Snelling, WF Buren, Description of a new species of slave-making ant in the *Formica sanguinea* group (Hymenoptera:
- 125 Formicidae). *Gt. Lakes Entomol.* **18**, 69–78 (1985).
- 126 4. B Seifert, A taxonomic revision of the ant subgenus *Coptoformica* Mueller, 1923 (Hymenoptera, Formicidae). *Zoosystema*,
- 127 517–568 (2000).
- 128 5. B Seifert, A taxonomic revision of the *Formica cinerea* group (Hymenoptera: Formicidae). *Abhandlungen und Berichte*
- 129 *des Naturkundemuseums Görlitz* **74**, 245–272 (2002).
- 130 6. B Seifert, The "Black Bog Ant" *Formica picea* Nylander, 1846 - a species different from *Formica candida* Smith, 1878
- 131 (Hymenoptera: Formicidae). *Myrmecologische Nachrichten* **6**, 29–38 (2004).
- 132 7. AV Goropashnaya, VB Fedorov, P Pamilo, Recent speciation in the *Formica rufa* group ants (Hymenoptera, Formicidae):
- 133 inference from mitochondrial DNA phylogeny. *Mol. Phylogenetics Evol.* **32**, 198–206 (2004).
- 134 8. AV Goropashnaya, VB Fedorov, B Seifert, P Pamilo, Phylogenetic relationships of Palaearctic *Formica* species (Hy-
- 135 menoptera, Formicidae) based on mitochondrial cytochrome B sequences. *PloS ONE* **7**, e41697 (2012).
- 136 9. JC Trager, JA MacGown, MD Trager, Revision of the Nearctic endemic *Formica pallidefulva* group. *Memoirs Am.*
- 137 *Entomol. Inst.* **80**, 610–636 (2007).
- 138 10. JC Trager, Global revision of the dulotic ant genus *Polyergus* (Hymenoptera: Formicidae, Formicinae, Formicini). *Zootaxa*
- 139 **3722**, 501–548 (2013).
- 140 11. B Seifert, R Schultz, A taxonomic revision of the *Formica rufibarbis* Fabricius, 1793 group (Hymenoptera: Formicidae).
- 141 *Myrmecological News* **12**, 255–272 (2009).
- 142 12. B Seifert, R Schultz, A taxonomic revision of the *Formica subpilosa* Ruzsky, 1902 group (Hymenoptera: Formicidae).
- 143 *Myrmecological News* **12**, 67–83 (2009).
- 144 13. M Muñoz-López, et al., A new taxonomic status for *Iberoformica* (Hymenoptera, Formicidae) based on the use of
- 145 molecular markers. *J. Zool. Syst. Evol. Res.* **50**, 30–37 (2012).
- 146 14. IA Antonov, YS Bukin, Molecular phylogenetic analysis of the ant genus *Formica* L. (Hymenoptera: Formicidae) from
- 147 Palearctic region. *Russ. J. Genet.* **52**, 810–820 (2016).
- 148 15. Y Chen, S Zhou, Phylogenetic relationships based on DNA barcoding among 16 species of the ant genus *Formica*
- 149 (Hymenoptera: Formicidae) from China. *J. Insect Sci.* **17**, 117 (2017).
- 150 16. J Romiguier, J Rolland, C Morandin, L Keller, Phylogenomics of palearctic *Formica* species suggests a single origin of
- 151 temporary parasitism and gives insights to the evolutionary pathway toward slave-making behaviour. *BMC Evol. Biol.*
- 152 **18**, e40 (2018).
- 153 17. B Seifert, A taxonomic revision of the Palaearctic members of the *Formica rufa* group (Hymenoptera: Formicidae) – the
- 154 famous mound-building red wood ants. *Myrmecological News*, 133–179 (2021).
- 155 18. BB Blaimer, et al., Phylogenomic methods outperform traditional multi-locus approaches in resolving deep evolutionary
- 156 history: a case study of formicine ants. *BMC Evol. Biol.* **15**, e271 (2015).
- 157 19. S Fisher, et al., A scalable, fully automated process for construction of sequence-ready human exome targeted capture
- 158 libraries. *Genome Biol.* **12**, R1 (2011).
- 159 20. N Rohland, D Reich, Cost-effective, high-throughput DNA sequencing libraries for multiplexed target capture. *Genome*
- 160 *Res.* **22**, 939–946 (2012).
- 161 21. BC Faircloth, MG Branstetter, ND White, SG Brady, Target enrichment of ultraconserved elements from arthropods
- 162 provides a genomic perspective on relationships among Hymenoptera. *Mol. Ecol. Resour.* **15**, 489–501 (2014).
- 163 22. BC Faircloth, TC Glenn, Not all sequence tags are created equal: designing and validating sequence identification tags
- 164 robust to indels. *PLoS ONE* **7**, e42543 (2012).
- 165 23. MG Branstetter, JT Longino, PS Ward, BC Faircloth, Enriching the ant tree of life: enhanced UCE bait set for
- 166 genome-scale phylogenetics of ants and other Hymenoptera. *Methods Ecol. Evol.* **9**, 768–776 (2017).
- 167 24. B Blumenstiel, et al., Targeted exon sequencing by in-solution hybrid selection. *Curr. Protoc. Hum. Genet.* **66**,
- 168 18.4.1–18.4.24 (2010).
- 169 25. BC Faircloth, PHYLUCE is a software package for the analysis of conserved genomic loci. *Bioinformatics* **32**, 786–788
- 170 (2015).
- 171 26. AM Bolger, M Lohse, B Usadel, Trimmomatic: a flexible trimmer for Illumina sequence data. *Bioinformatics* **30**,
- 172 2114–2120 (2014).
- 173 27. MG Grabherr, et al., Full-length transcriptome assembly from RNA-seq data without a reference genome. *Nat. Biotechnol.*
- 174 **29**, 644–652 (2011).
- 175 28. ND Nguyen, S Mirarab, K Kumar, T Warnow, Ultra-large alignments using phylogeny-aware profiles. *Genome Biol.* **16**,
- 176 124 (2015).
- 177 29. ML Borowiec, AMAS: a fast tool for alignment manipulation and computing of summary statistics. *PeerJ* **4**, e1660
- 178 (2016).
- 179 30. A Larsson, AliView: a fast and lightweight alignment viewer and editor for large datasets. *Bioinformatics* **30**, 3276–3278
- 180 (2014).

- 181 31. G Tan, et al., Current methods for automated filtering of multiple sequence alignments frequently worsen single-gene  
182 phylogenetic inference. *Syst. Biol.* **64**, 778–791 (2015).
- 183 32. S Capella-Gutierrez, JM Silla-Martinez, T Gabaldon, trimAl: a tool for automated alignment trimming in large-scale  
184 phylogenetic analyses. *Bioinformatics* **25**, 1972–1973 (2009).
- 185 33. E Paradis, J Claude, K Strimmer, APE: Analyses of phylogenetics and evolution in R language. *Bioinformatics* **20**,  
186 289–290 (2004).
- 187 34. E Paradis, *Analysis of Phylogenetics and Evolution with R*. (Springer Science & Business Media), pp. xv + 385 pp.  
188 (2012).
- 189 35. D Charif, JR Lobry, *SeqinR 1.0-2: A Contributed Package to the R Project for Statistical Computing Devoted to Biological*  
190 *Sequences Retrieval and Analysis*, eds. U Bastolla, M Porto, HE Roman, M Vendruscolo. (Springer Berlin Heidelberg,  
191 Berlin, Heidelberg), pp. 207–232 (2007).
- 192 36. S Kalyaanamoorthy, BQ Minh, TK Wong, A von Haeseler, LS Jermin, ModelFinder: fast model selection for accurate  
193 phylogenetic estimates. *Nat. Methods* **14**, 587 (2017).
- 194 37. LT Nguyen, HA Schmidt, A von Haeseler, BQ Minh, IQ-TREE: a fast and effective stochastic algorithm for estimating  
195 maximum-likelihood phylogenies. *Mol. Biol. Evol.* **32**, 268–274 (2014).
- 196 38. O Chernomor, A von Haeseler, BQ Minh, Terrace aware data structure for phylogenomic inference from supermatrices.  
197 *Syst. Biol.* **65**, 997–1008 (2016).
- 198 39. VA Tagliacollo, R Lanfear, Estimating improved partitioning schemes for ultraconserved elements. *Mol. Biol. Evol.* **35**,  
199 1798–1811 (2018).
- 200 40. JB Pease, JW Brown, JF Walker, CE Hinchliff, SA Smith, Quartet sampling distinguishes lack of support from conflicting  
201 support in the green plant tree of life. *Am. J. Bot.* **105**, 385–403 (2018).
- 202 41. C Zhang, M Rabiee, E Sayyari, S Mirarab, ASTRAL-III: polynomial time species tree reconstruction from partially  
203 resolved gene trees. *BMC Bioinforma.* **19**, 153 (2018).
- 204 42. S Roch, T Warnow, On the robustness to gene tree estimation error (or lack thereof) of coalescent-based species tree  
205 methods. *Syst. Biol.* **64**, 663–676 (2015).
- 206 43. S Mirarab, MS Bayzid, B Boussau, T Warnow, Statistical binning enables an accurate coalescent-based estimation of the  
207 avian tree. *Science* **346**, 1250463 (2014).
- 208 44. MS Bayzid, S Mirarab, B Boussau, T Warnow, Weighted statistical binning: enabling statistically consistent genome-scale  
209 phylogenetic analyses. *PLoS ONE* **10**, e0129183 (2015).
- 210 45. BQ Minh, MAT Nguyen, A von Haeseler, Ultrafast approximation for phylogenetic bootstrap. *Mol. Biol. Evol.* **30**,  
211 1188–1195 (2013).
- 212 46. RH Adams, TA Castoe, Statistical binning leads to profound model violation due to gene tree error incurred by trying to  
213 avoid gene tree error. *Mol. Phylogenetics Evol.* **134**, 164–171 (2019).
- 214 47. E Sayyari, JB Whitfield, S Mirarab, Fragmentary gene sequences negatively impact gene tree and species tree reconstruc-  
215 tion. *Mol. Biol. Evol.* **34**, 3279–3291 (2017).
- 216 48. Z Yang, PAML 4: Phylogenetic analysis by maximum likelihood. *Mol. Biol. Evol.* **24**, 1586–1591 (2007).
- 217 49. M dos Reis, Z Yang, Approximate likelihood calculation on a phylogeny for bayesian estimation of divergence times. *Mol.*  
218 *Biol. Evol.* **28**, 2161–2172 (2011).
- 219 50. M dos Reis, et al., Phylogenomic datasets provide both precision and accuracy in estimating the timescale of placental  
220 mammal phylogeny. *Proc. Royal Soc. B: Biol. Sci.* **279**, 3491–3500 (2012).
- 221 51. GN Aleksandrova, NI Zaporozhets, Palynological characteristics of Upper Cretaceous and Paleogene deposits on the west  
222 of the Sambian Peninsula (Kaliningrad region), Part 1. *Stratigr. Geol. Correl.* **16**, 295–316 (2008).
- 223 52. GN Aleksandrova, NI Zaporozhets, Palynological characteristics of Upper Cretaceous and Paleogene deposits on the west  
224 of the Sambian Peninsula (Kaliningrad region), Part 2. *Stratigr. Geol. Correl.* **16**, 528–539 (2008).
- 225 53. NJ Matzke, *Probabilistic historical biogeography: new models for founder-event speciation, imperfect detection, and fossils*  
226 *allow improved accuracy and model-testing*. (University of California, Berkeley), (2013).
- 227 54. NJ Matzke, Model selection in historical biogeography reveals that founder-event speciation is a crucial process in island  
228 clades. *Syst. Biol.* **63**, 951–970 (2014).
- 229 55. J Dupin, et al., Bayesian estimation of the global biogeographical history of the Solanaceae. *J. Biogeogr.* **44**, 887–899  
230 (2017).
- 231 56. JP Huelsenbeck, R Nielsen, JP Bollback, Stochastic mapping of morphological characters. *Syst. Biol.* **52**, 131–158 (2003).
- 232 57. PO Lewis, A likelihood approach to estimating phylogeny from discrete morphological character data. *Syst. Biol.* **50**,  
233 913–925 (2001).
- 234 58. LJ Harmon, JT Weir, CD Brock, RE Glor, W Challenger, GEIGER: investigating evolutionary radiations. *Bioinformatics*  
235 **24**, 129–131 (2007).
- 236 59. LJ Revell, phytools: an R package for phylogenetic comparative biology (and other things). *Methods Ecol. Evol.* **3**,  
237 217–223 (2011).
- 238 60. PC Frumhoff, PS Ward, Individual-level selection, colony-level selection, and the association between polygyny and  
239 worker monomorphism in ants. *Am. Nat.* **139**, 559–590 (1992).
- 240 61. LE Snyder, The genetics of social behavior in a polygynous ant. *Naturwissenschaften* **79**, 525–527 (1992).
- 241 62. R Savolainen, RJ Deslippe, Facultative and obligate slave making in *Formica* ants. *Naturwissenschaften* **88**, 347–350

- (2001).
63. B Seifert, *The ants of Central and North Europe*. (Lutra Verlags- und Vertriebsgesellschaft, Tauer), p. 408 pp. (2018).
64. WM Wheeler, A revision of the ants of the genus *Formica* (Linné) Mayr. *Bull. Mus. Comp. Zool.* **53**, 379–565 (1913).
65. D Zhu, M Chapuisat, P Pamilo, Highly variable social organisation of colonies in the ant *Formica cinerea*. *Hereditas* **139**, 7–12 (2003).
66. K Lindström, SÅ Berglind, P Pamilo, Variation of colony types in the ant *Formica cinerea*. *Insectes Sociaux* **43**, 329–332 (1996).
67. AV Goropashnaya, P Seppa, P Pamilo, Social and genetic characteristics of geographically isolated populations in the ant *Formica cinerea*. *Mol. Ecol.* **10**, 2807–2818 (2001).
68. B Seifert, *Die Ameisen Mittel- und Nordeuropas*. (Lutra Verlags- und Vertriebsgesellschaft, Tauer), p. 368 pp. (2007).
69. E Wasmann, Neues über die zusammengesetzten Nester und gemischten Kolonien der Ameisen [part]. *Allgemeine Zeitschrift für Entomol.* **7**, 1–5 (1902).
70. M Talbot, Flights of the ant *Formica dakotensis* Emery. *Psyche*, 169–179 (1972).
71. W MacKay, E Mackay, *The ants of New Mexico (Hymenoptera: Formicidae)*. (Edwin Mellen Press, Lewiston, New York), p. 400 pp. (2002).
72. E Skibińska, L'étude du phénomène de la monogynie et de la polygynie chez *Formica (Coptoformica) exsecta* Nyl. *Memorab. Zool.* **38**, 67–111 (1982).
73. WD Brown, L Keller, Colony sex ratios vary with queen number but not relatedness asymmetry in the ant *Formica exsecta*. *Proc. Royal Soc. London. Ser. B: Biol. Sci.* **267**, 1751–1757 (2000).
74. C Haag-Liautard, JS Pedersen, O Ovaskainen, L Keller, Breeding system and reproductive skew in a highly polygynous ant population. *Insectes Sociaux* **55**, 347–354 (2008).
75. DN Goryunov, Nest-building in ants *Formica exsecta* (Hymenoptera, Formicidae). *Entomol. Rev.* **95**, 953–958 (2015).
76. WF Buren, New ants from Minnesota, Iowa, and Wisconsin. *Iowa State Coll. J. Sci.* **16**, 399–408 (1942).
77. F Bernard, *Faune de l'Europe et du Bassin Méditerranéen. 3. Les fourmis (Hymenoptera Formicidae) d'Europe occidentale et septentrionale*. (Masson, Paris), p. 411 pp. (1967).
78. WS Creighton, A revision of the North American variants of the ant *Formica rufa*. *Am. Mus. Novitates*, 1–10 (1940).
79. WF Buren, A list of iowa ants. *Iowa State Coll. J. Sci.*, 277–312 (1944).
80. P Seppä, et al., Population genetics of the black ant *Formica lemani* (Hymenoptera: Formicidae). *Biol. J. Linnean Soc.* **97**, 247–258 (2009).
81. M Gardner, K Schönrogge, G Elmes, J Thomas, Increased genetic diversity as a defence against parasites is undermined by social parasites: *Microdon mutabilis* hoverflies infesting *Formica lemani* ant colonies. *Proc. Royal Soc. B: Biol. Sci.* **274**, 103–110 (2006).
82. P Pamilo, L Sundström, W Fortelius, R Rosengren, Diploid males and colony-level selection in *Formica* ants. *Ethol. Ecol. Evol.* **6**, 221–235 (1994).
83. A Maeder, D Cherix, Problèmes posés par *Formica paralugubris*, une nouvelle espèce de fourmis des bois. *Actes des Colloques Insectes Sociaux*, 21–25 (2001).
84. N Gyllenstrand, P Seppä, Conservation genetics of the wood ant, *Formica lugubris*, in a fragmented landscape. *Mol. Ecol.* **12**, 2931–2940 (2003).
85. WM Wheeler, A new type of social parasitism among ants. *Bull. Am. Mus. Nat. Hist.* **20**, 347–375 (1904).
86. M Talbot, The natural history of ants of michigan's es george reserve: A 26 year study. *Misc. Publ. Mus. Zool. Univ. Mich.*, 1–288 (2012).
87. D Sather, Ph.D. thesis (University of North Dakota) (1972).
88. CA Collingwood, The Formicidae (Hymenoptera) of Fennoscandia and Denmark. *Fauna Entomol. Scand.*, 1–174 (1979).
89. F Ito, S Higashi, Temporary social parasitism in the enslaving ant species *Formica sanguinea* Latreille: an important discovery related to the evolution of dulosis in *Formica* ants. *J. Ethol.* **8**, 33–35 (1990).
90. AM Holmquist, Untersuchungen zur Gründung neuer Völker bei *Formica pratensis* Retzius (Hymenoptera, Formicidae). *Waldhygiene* **20**, 43–56 (1994).
91. U Sorensen, G Schmidt, Die hügelbauenden Waldameisen in Waldgebieten der Bredstedter Geest (Schleswig-Holstein) (Genus *Formica*, Insecta). *Zeitschrift für Angewandte Zool.* **70**, 285–319 (1982).
92. P Pamilo, R Rosengren, Evolution of nesting strategies of ants: genetic evidence from different population types of *Formica* ants. *Biol. J. Linnean Soc.* **21**, 331–348 (1984).
93. CH Kennedy, CA Dennis, New ants from Ohio and Indiana, *Formica prociliata*, *F. querquetulana*, *F. postoculata* and *F. lecontei*, (Formicidae: Hymenoptera). *Annals Entomol. Soc. Am.*, 531–544 (1937).
94. K Gösswald, *Die Waldameise: Biologie, Ökologie und forstliche Nutzung*. (AULA-Verlag, Wiesbaden), p. 652 pp. (2012).
95. N Gammans, Conserving the red-barbed ant (*Formica rufibarbis*) in the United Kingdom, Technical report (2008).
96. A Mori, FL Moli, Mating behavior and colony founding of the slave-making ant *Formica sanguinea* (Hymenoptera: Formicidae). *J. Insect Behav.* **11**, 235–245 (1998).
97. M Talbot, The natural history of the workerless ant parasite *Formica talbotae*. *Psyche* **83**, 282–288 (1977).
98. EO Wilson, The first workerless parasite in the ant genus *Formica* (Hymenoptera: Formicidae). *Psyche* **83**, 277–281 (1977).
99. AM Holmquist, Notes on the life history and habits of the mound-building ant, *Formica ulkei* Emery. *Ecology* **9**, 70–87

- 303 (1928).
- 304 100. T Busch, Hinweise zur Verbreitung von *Formica uralensis* Ruzsky, 1895-Myrmekologische Notizen aus Mecklenburg-  
305 Vorpommern (Hymenoptera, Formicidae). *Ameisenschutz Aktuell* **12**, 1–11 (1998).
- 306 101. W Münch, Ph.D. thesis (Eberhard-Karls-Universität Tübingen) (1991).
- 307 102. G Preuß, Zum Vorkommen bemerkenswerter Ameisen in Schleswig-Holstein (Hym., Form.). *Faunistische Mitteilungen*  
308 *aus Nord.* **7**, 9–12 (1956).
- 309 103. G Preuß, Zur Kenntnis der Uralameise, *Formica uralensis* Ruzsky. *Faunistische Mitteilungen aus Nord.* **8**, 2–4 (1957).
- 310 104. A Tinaut, Descripción del macho de *Formica subrufa* Roger, 1859 y creación de un nuevo subgénero (Hymenoptera:  
311 Formicidae). *EOS. Revista Española de Entomol.* **65**, 281–291 (1990).
- 312 105. C Galkowski, C Lebas, P Wegnez, A Lenoir, R Blatrix, Redescription of *Proformica nasuta* (Nylander, 1856) (Hymenoptera,  
313 Formicidae) using an integrative approach. *Eur. J. Taxon.* (2017).
- 314 106. F Ruano, A Tinaut, Mating behaviour in a slave-making ant, *Rossomyrmex minuchae* (Hymenoptera, Formicidae).  
315 *Naturwissenschaften* **92**, 328–331 (2005).
